# Supplementary material for: Nanoplastics Increase Fish Susceptibility to Nodavirus Infection and Reduce Antiviral Immune Responses
Source: MDPI journal article supplement (doi:10.3390/ijms23031483), 2022-01-27
Supplement: s1 [file s1]

**Table S1.** Primers used for analysis of gene expression by real-time PCR in this study.

| Protein Name                                    | Gene         | Target      | Sequence (5'→3')                                 | Acc. Number                  |
|-------------------------------------------------|--------------|-------------|--------------------------------------------------|------------------------------|
| NNV capsid protein                              | NNV cp       | NNV         | GACGCGCTTCAAGCAACTC<br>CGAACACTCCAGCGACACAGCA    | D38636                       |
| Ribosomal protein S18                           | <i>rps18</i> | SaB-1 cells | CGAAAGCATTGCGCAAGAAT<br>AGTTGGCACCGTTTATGGTC     | AM490061                     |
|                                                 |              | Sea bass    | TTCCTTTGATCGCTCTTAACG<br>TCTGATAAATGCACGCATCC    | AY831388                     |
| Elongation factor 1 $\alpha$                    | <i>ef1a</i>  | SaB-1 cells | CTTCAACGCTCAGGTCATCAT<br>GCACAGCGAAACGACCAAGGGGA | AF184170                     |
|                                                 |              | Sea bass    | CGTTGGCTTCAACATCAAGA<br>GAAGTTGTCTGCTCCCTTGG     | AJ866727                     |
| Myeloperoxidase                                 | <i>mpo</i>   | SaB-1 cells | TTGGTCCAGACATCCTCG<br>ATGGGCAAAGCGGTAG           | FM148574                     |
|                                                 |              | Sea bass    | GAAGAGTGGGGCCTTTGTTT<br>CTGGGCCCTCAGTGAAGACTC    | DLAgn_00118340               |
| Interleukin 8                                   | <i>il8</i>   | SaB-1 cells | GCCACTCTGAAGAGGACAGG<br>TTTGGTTGCTTTGGTCGAA      | AM765841                     |
|                                                 |              | Sea bass    | GTCTGAGAAGCCTGGGAGTG<br>GCAATGGGAGTTAGCAGGAA     | AM490063                     |
| Interleukin 1 $\beta$                           | <i>il1b</i>  | SaB-1 cells | GGGCTGAACAACAGCACTCTC<br>TTAACTCTCCACCCTCCA      | AJ277166                     |
|                                                 |              | Sea bass    | CAGGACTCCGTTTGAACAT<br>GTCCATTCAAAAGGGGACAA      | AJ269472                     |
| Melanoma differentiation-associated gene 5      | <i>mda5</i>  | SaB-1 cells | CATCGAGATCATCGAGGACA<br>CCAGATGTCGCTCTTGAAGG     | HS988207                     |
|                                                 |              | Sea bass    | AATTCCGCAATGGTGAAGTC<br>TCATTGGTCACAAGGCCATA     | AM986362                     |
| Interferon regulatory factor 3                  | <i>irf3</i>  | SaB-1 cells | TCAGAATGCCCAAGAGATT<br>AGAGTCTCCGCCTTCAGATG      | AM956899                     |
|                                                 |              | Sea bass    | AGAGGTGAGTGGCAATGGTC<br>GAGCAGTTTGAAGCCTTTGG     | CBN81356                     |
| dsRNA-dependent protein kinase receptor         | <i>pkr</i>   | SaB-1 cells | TCCTTTGGAACCTCCCTACC<br>TCGAGGGGGAAATGTTGTAA     | HS988732                     |
|                                                 |              | Sea bass    | AGGGTCAGAGCATCAAGGAA<br>GACACCTTGCTGTCCCAGTC     | FM008342                     |
| Nuclear factor (erythroid-derived 2)-like 2     | <i>nrf2</i>  | Sea bass    | GTTCAGTCGGTGCTTTGACA<br>CTCTGATGTGCGTCTCTCCA     | FP335773                     |
| Macrophage colony-stimulating factor 1 receptor | <i>csf1r</i> | Sea bass    | TTTCGGAAAGTTGTTGAGG<br>TCTCATCTGAATGGGCACTG      | KM225787                     |
| CXC chemokine 9                                 | <i>cxcl9</i> | Sea bass    | TCTGTCAGCTCGCCTTTCTG<br>TTCGTAAGTTGGACACGCACA    | DLAgn_00012980               |
| CXC motif chemokine receptor 3                  | <i>cxcr3</i> | Sea bass    | ATCCTGTACGCCTTTGTGGG<br>GTCGGCAGACTCAGACCAAA     | ENSDLAT00005001752.1         |
| Heat-shock protein 70                           | <i>hsp70</i> | Sea bass    | GATCGAGAGGATGGTGCAGG<br>TTGCCCTTCAAGTTCTCGTC     | DLAgn_00212020               |
| Myxovirus (influenza) resistance protein        | <i>mx</i>    | Sea bass    | GTATGAGGAGAAGGTGCGTCC<br>CTCTTCCCCGAGCTTTGGTC    | AM228977, HQ237501, AY424961 |
| Interferon-stimulated gene 15                   | <i>isg15</i> | Sea bass    | ACCGTCCGCTGTCTATTGACTA<br>CAGATGCCCCAGCGAAACC    | HG916840                     |
