# Supplementary figures and images for: Nanoplastics Increase Fish Susceptibility to Nodavirus Infection and Reduce Antiviral Immune Responses
Source: MDPI journal article supplement (doi:10.3390/ijms23031483), 2022-01-27

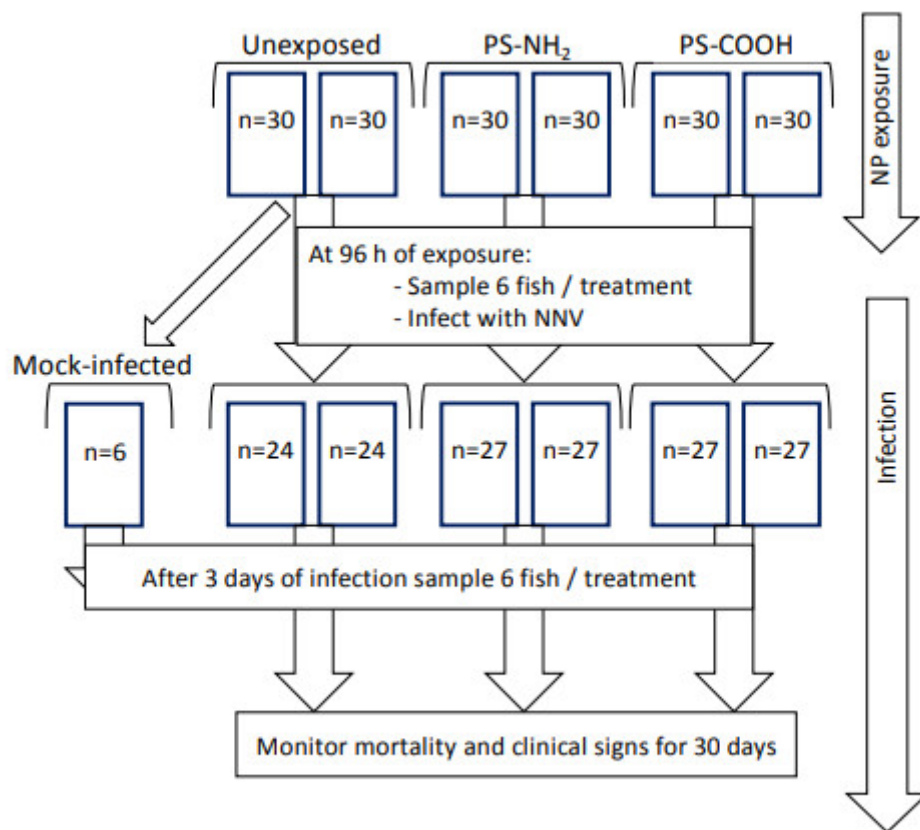

**Supplementary Figure S1.** Summary of the experimental design.

Supplement: s1 [file s1]
